# Supplementary material
Source: PubMed Central journal article supplement (PMC4614452)
Supplement: rsif20150262supp1.pdf [file rsif20150262supp1.pdf]

**Supplementary Information:**

**Supplementary Figure 1**

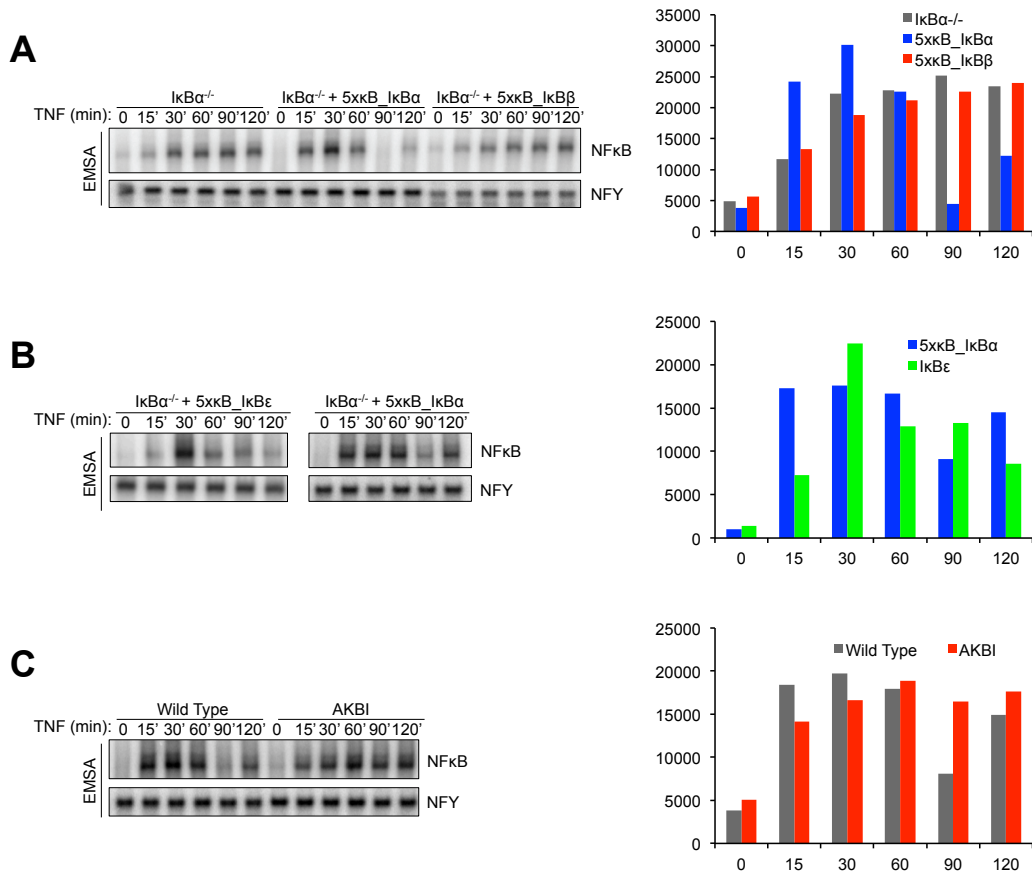

**Supplementary Figure 1: A)** Replicate data of EMSA experiments and quantitation presented in Figure 1B and C showing reproducibility of trends for 5xkB\_IkBα and 5xkb\_IkBβ reconstitution experiments. **B)** NFκB activity in IkBα<sup>-/-</sup> cells reconstituted with NFκB inducible IkBε. **C)** Replicate data of EMSA experiments and quantitation presented in Figure 1D showing reproducibility of trends for AKBI experiments. NFκB label indicates p50:p65 heterodimer, in A-C bottom band is NFY control for EMSA.

## Supplementary Figure 2

**A**

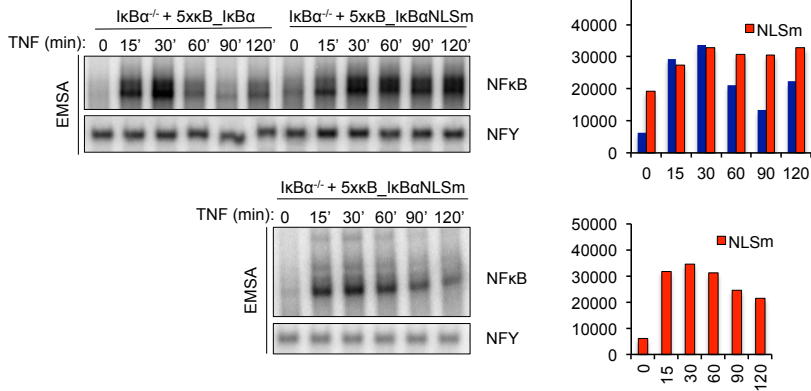

**B**

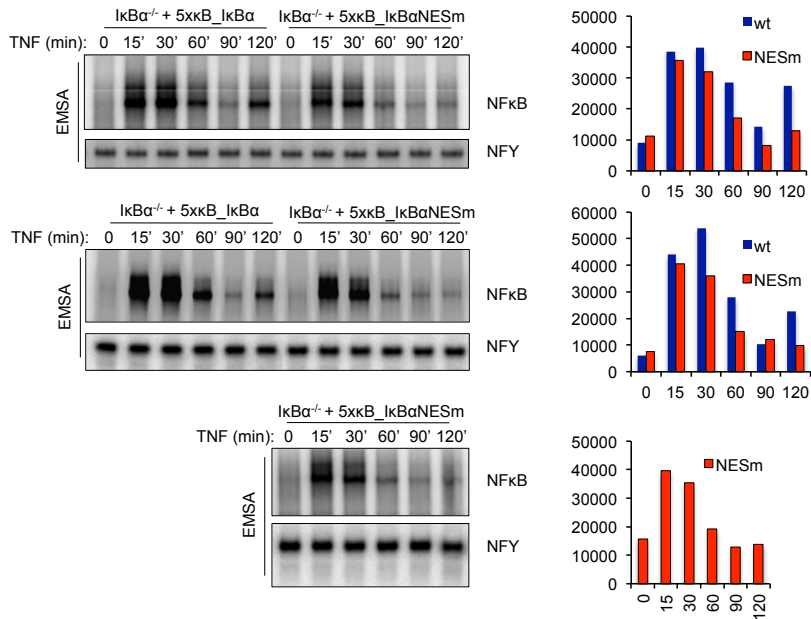

**C**

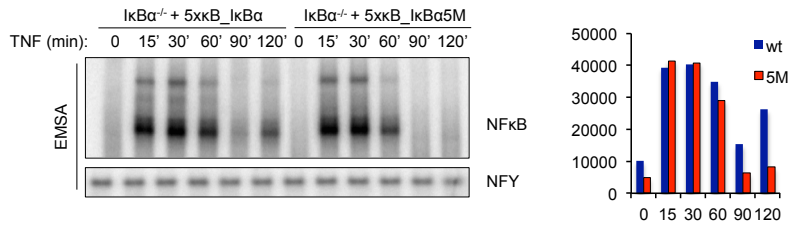

**Supplementary Figure 2: A-C** Replicate data of EMSA experiments and quantitation presented in Figure 3A, C, & E showing reproducibility of trends for NLSm, NESm, and 5m IkBa constructs, respectively. NFkB label indicates p50:p65 heterodimer bottom band is NFY control.

**Supplementary Table 1:** Species considered in the kinetic model.

| <b>Abbreviation</b> | <b>Component</b> | <b>Compartment</b> |
|---------------------|------------------|--------------------|
| ikk                 | IKK              | cytoplasm          |
| nfkbn               | NFκB             | cytoplasm          |
| nfkbn               | NFκB             | nuclear            |
| ikbat               | IκBα mRNA        | cytoplasm          |
| ikba                | IκBα             | cytoplasm          |
| ikban               | IκBα             | nuclear            |
| ibkanfkbn           | IκBαNFκB         | cytoplasm          |
| ikbanfkbn           | IκBαNFκB         | nuclear            |
| ikkikba             | IKKIκBα          | cytoplasm          |
| ikkikbanfkbn        | IKKIκBαNFκB      | cytoplasm          |

**Supplementary Table 2:** Reactions and parameters included in the model. The rightmost column indicates the references used as sources for the parameters. Parameters J, L, and N are given in units of the Boltzman constant  $K_B$  times the temperature.

| Label          | Reaction                      | Type                                   | Compartment | Value             | Units                              | Ref |
|----------------|-------------------------------|----------------------------------------|-------------|-------------------|------------------------------------|-----|
| a_c_ai         | IkBa + IKK => IKKIkBa         | Association                            | Cyt         | 1.35              | $\mu\text{M}^{-1} \text{min}^{-1}$ | 1   |
| a_c_an         | IkBa + NFkB => IkBaNFkB       | Association                            | Cyt         | 30                | $\mu\text{M}^{-1} \text{min}^{-1}$ | 1   |
| a_c_2ain       | IKKIkBa + NFkB => IKKIkBaNFkB | Association                            | Cyt         | 30                | $\mu\text{M}^{-1} \text{min}^{-1}$ | 1   |
| a_c_2ani       | IkBaNFkB + IKK => IKKIkBaNFkB | Association                            | Cyt         | 11.1              | $\mu\text{M}^{-1} \text{min}^{-1}$ | 1   |
| a_n_an         | IkBan + NFkBn => IkBaNFkBn    | Association                            | Nuc         | 30                | $\mu\text{M}^{-1} \text{min}^{-1}$ | 1   |
| d_c_ai         | IKKIkBa => IKK + IkBa         | Dissociation                           | Cyt         | 0.075             | $\text{min}^{-1}$                  | 1   |
| d_c_an         | IkBaNFkB => IkBa + NFkB       | Dissociation                           | Cyt         | 0.00006           | $\text{min}^{-1}$                  | 2   |
| d_c_2ain       | IKKIkBaNFkB => IKKIkBa + NFkB | Dissociation                           | Cyt         | 0.00006           | $\text{min}^{-1}$                  | 2   |
| d_c_2ani       | IKKIkBaNFkB => Ikk + IkBaNFkB | Dissociation                           | Cyt         | 0.075             | $\text{min}^{-1}$                  | 1   |
| d_n_an         | IkBaNFkBn => IkBan + NFkBn    | Dissociation                           | Nuc         | 0.00006           | $\text{min}^{-1}$                  | 2   |
| ex_a           | IkBan => IkBa                 | Export                                 | Nuc->Cyt    | 0.012             | $\text{min}^{-1}$                  | 1   |
| ex_n           | NFkBn => NFkB                 | Export                                 | Nuc->Cyt    | 0.0048            | $\text{min}^{-1}$                  | 1   |
| ex_2an         | IkBaNFkBn => IkBaNFkB         | Export                                 | Nuc->Cyt    | 0.828             | $\text{min}^{-1}$                  | 1   |
| in_a           | IkBa => IkBan                 | Import                                 | Cyt->Nuc    | 0.018             | $\text{min}^{-1}$                  | 1   |
| in_n           | NFkB => NFkBn                 | Import                                 | Cyt->Nuc    | 5.4               | $\text{min}^{-1}$                  | 1   |
| pd_c_a         | IkBa= >                       | Prot. deg.                             | Cyt         | 0.12              | $\text{min}^{-1}$                  | 2   |
| pd_c_2ai       | IKKIkBa => IKK                | Prot. deg.                             | Cyt         | 0.0018            | $\text{min}^{-1}$                  | 2   |
| pd_c_2an       | IkBaNFkB => NFkB              | Prot. deg.                             | Cyt         | $\text{min}^{-1}$ | $\text{min}^{-1}$                  | 2   |
| pd_c_3ain      | IKKIkBaNFkB => IKK + NFkB     | Prot. deg.                             | Cyt         | 0.36              | $\text{min}^{-1}$                  | 2   |
| pd_n_2an       | IkBaNFkBn => NFkBn            | Prot. deg.                             | Nuc         | 0.00006           | $\text{min}^{-1}$                  | 2   |
| pd_n_a         | IkBan =>                      | Prot. deg.                             | Nuc         | 0.12              | $\text{min}^{-1}$                  | 1   |
| ps_c_a         | => IkBa                       | Prot. synth.                           | Cyt         | 0.2448            | $\text{min}^{-1}$                  | 1   |
| rd_a           | IkBat =>                      | RNA deg.                               | Cyt         | 0.035             | $\text{min}^{-1}$                  | 3   |
| rs_an          | => IkBat                      | (induced by NF- $\kappa$ B) RNA synth. | Nuc->Cyt    | 0.06              | $\mu\text{M}^{-1} \text{min}^{-1}$ | 3   |
| K <sub>A</sub> |                               |                                        |             | 0.2               | $\mu\text{M}$                      | 3,4 |
| J              |                               |                                        |             | 5.8               | $K_B T$                            | 3,4 |
| L              |                               |                                        |             | -1.3              | $K_B T$                            | 3,4 |
| N              |                               |                                        |             | 0.1               | $K_B T$                            | 3,4 |
| rs_a           | => IkBat                      | (constitutive) RNA synth.              | Nuc->Cyt    | 0.00052           | $\mu\text{M}^{-1} \text{min}^{-1}$ | 3   |

**Supplementary Table 3:** Numerical function used to represent IKK activity over time. The function reflects typical IKK activity curves determined by kinase assays <sup>(1,2)</sup>. Activity between time points were determined using linear interpolation.

| Time (min) | IKK activity (normalized 0-1) |
|------------|-------------------------------|
| 0          | 0.01                          |
| 5          | 0.6                           |
| 10         | 1                             |
| 15         | 0.65                          |
| 20         | 0.5                           |
| 25         | 0.36                          |
| 30         | 0.3                           |
| 60         | 0.3                           |
| 360        | 0.3                           |

The response of the NFκB regulatory module was simulated using the computational ODE-based model described in <sup>3</sup> which was derived from <sup>1</sup> and <sup>2</sup>. Briefly, the model considers the various reactions between complexes comprising combinations of IKK, NFκB and IκBα (Sup. Table 1 and 2). In order to avoid obfuscating the roles of the various regulatory mechanisms involving IκBα, we removed the other IκB family members from the model. The model incorporates production and degradation of IκBα and the corresponding mRNA. Levels of RelA and IKK do not change appreciably in the time scale of the experiments and therefore their abundances are considered fixed parameters. All reactions, except NFκB-dependent induction of IκBα follow mass action kinetics. NFκB-dependent induction of IκBα is represented by the model in <sup>4</sup> (model 3, additive Pol II recruitment, n=5) (Equations 1-3) and occurs with an explicit delay of 15 minutes.

$$\frac{d[mRNA]}{dt} = rs\_an \frac{1}{1 + \frac{1}{F_{REG}} e^{\beta J}} \quad [1]$$

$$F_{REG} = \frac{2^{-n} \left[ \frac{[A]}{K_A} e^{-\beta(L+N)} - \sqrt{\frac{[A]}{K_A} e^{-\beta L} \left( e^{-\beta N} \left( \frac{[A]}{K_A} e^{-\beta(L+N)} - 2 \right) + 4 \right) + 1 + 1} \right]^n + 2^{-n} \left[ \frac{[A]}{K_A} e^{-\beta(L+N)} + \sqrt{\frac{[A]}{K_A} e^{-\beta L} \left( e^{-\beta N} \left( \frac{[A]}{K_A} e^{-\beta(L+N)} - 2 \right) + 4 \right) + 1 + 1} \right]^n}{2^{-n} \left[ \frac{[A]}{K_A} e^{-\beta N} - \sqrt{\frac{[A]}{K_A} e^{-\beta N} \left( e^{-\beta N} \left( \frac{[A]}{K_A} e^{-\beta N} - 2 \right) + 4 \right) + 1 + 1} \right]^n + 2^{-n} \left[ \frac{[A]}{K_A} e^{-\beta N} + \sqrt{\frac{[A]}{K_A} e^{-\beta N} \left( e^{-\beta N} \left( \frac{[A]}{K_A} e^{-\beta N} - 2 \right) + 4 \right) + 1 + 1} \right]^n} \quad [2]$$

$$\beta = \frac{1}{K_B T} \quad [3]$$

Here, [A] is the concentration of nuclear NFκB and the parameters L, N, J and K<sub>A</sub> are as in Supplemental Table 2.

Models were equilibrated with no stimulus until steady state was reached. An IKK multiplier of 0.01 was included during this stage to represent basal activity. As in <sup>3</sup>, exposure to TNF was simulated with a numerical function representing IKK activity (Sup. Table 3) determined under conditions similar to the experiments. This function was used as a multiplier for the reaction

terms including IKK-induced degradation of I $\kappa$ B. Time course curves in Figure 2 were generated by applying multipliers to the kinetic parameters corresponding to the reactions in Figure 2A. The multiplier values were:  $2^{-3, -2.5, -2, -1.5, -1, -0.5}$  (reactions 1,2,3 and 5) and  $2^{-6, -5, -4, -3, -2, -1}$  (reaction 4), reflecting different sensitivities for reaction 4. NF $\kappa$ B time courses are normalized to their peak value. Sensitivity ratios  $s_r(t)$  at a particular time  $t_i$  is defined as (eq 4):

$$(\text{nucNF}\kappa\text{B}^{\text{perturbed}} - \text{nucNF}\kappa\text{B}^{\text{unperturbed}})/\text{nucNF}\kappa\text{B}^{\text{unperturbed}}, \quad [4]$$

where  $\text{nucNF}\kappa\text{B}^{\text{perturbed/unperturbed}}$  are the normalized nuclear concentrations of NF $\kappa$ B at time  $t_i$  obtained with a model with/without a multiplicative factor (0.9, 0.5, 0.1) for the indicated kinetic rate parameter (values shown in percent units). The global average sensitivity in figure 2C was calculated as the root mean square of the  $s_r(t)$  sampled at 1 minute intervals between 1 and 120 minutes post-stimulation. . The differential equations were solved using the “StiffnessSwitching” method of the NDSolve function in the package Mathematica 8 (Wolfram Research, Champagne, IL).

## References:

1. Werner SL, Barken D, Hoffmann A. Stimulus specificity of gene expression programs determined by temporal control of IKK activity. *Science* 2005, 309:1857-1861.
2. Kearns JD, Basak S, Werner SL, Huang CS, Hoffmann A. I $\kappa$ B provides negative feedback to control NF- $\kappa$ B oscillations, signaling dynamics, and inflammatory gene expression. *J Cell Biol* 2006, 173:659-664.
3. Mukherjee SP, Behar M, Birnbaum HA, Hoffmann A, Wright PE, Ghosh G. Analysis of the RelA:CBP/p300 interaction reveals its involvement in NF- $\kappa$ B-driven transcription. *PLoS Biol* 2013, 11:e1001647.
4. Giorgetti L, Siggers T, Tiana G, Caprara G, Notarbartolo S, Corona T, Pasparakis M, Milani P, Bulyk ML, Natoli G. Noncooperative interactions between transcription factors and clustered DNA binding sites enable graded transcriptional responses to environmental inputs. *Mol Cell* 2010, 37:418-428.
